# Supplementary material
Source: PubMed Central journal article supplement (PMC1733006)
Supplement: jepicomh_59_2_158__1.pdf [file jepicomh_59_2_158__1.pdf]

**Table A** Population size, life expectancy at birth, educational attainment, per capita income, and Gini coefficients across Italian regions (n=20)

| Region                | Population size<br>(2000) | Life expectancy at<br>birth in years (2001) | Educational<br>attainment $\phi$ (1997) | Per capita income in<br>Euros (2000) | Gini (1995–2000)       |
|-----------------------|---------------------------|---------------------------------------------|-----------------------------------------|--------------------------------------|------------------------|
| Emilia-Romagna        | 3,994,905                 | 80.3                                        | 73.2                                    | 33,774.22                            | 0.246                  |
| Friuli Venezia Giulia | 1,118,883                 | 79.8                                        | 78.7                                    | 33,470.02                            | 0.257 $\dagger\dagger$ |
| Trentino Alto Adige   | 939,690                   | 80.5                                        | 58.3                                    | 31,945.44                            | 0.257 $\dagger\dagger$ |
| Lombardy              | 9,093,577                 | 79.7                                        | 63.3                                    | 31,707.35                            | 0.275                  |
| Tuscany               | 3,541,998                 | 80.5                                        | 74.2                                    | 30,753.98                            | 0.248                  |
| Veneto                | 4,526,284                 | 80.4                                        | 66.7                                    | 30,359.92                            | 0.252                  |
| Liguria               | 1,623,443                 | 79.7                                        | 72.8                                    | 29,698.56                            | 0.274                  |
| Marches               | 1,465,092                 | 81.2                                        | 78.2                                    | 28,771.30                            | 0.230                  |
| Piedmont              | 4,288,598                 | 79.6*                                       | 64.1                                    | 27,197.65&                           | 0.256 $\dagger$        |
| Aosta Valley          | 120,466                   | 79.6*                                       | 58.4                                    | 27,197.65&                           | 0.256 $\dagger$        |
| Umbria                | 837,985                   | 80.6                                        | 79.5                                    | 26,908.95                            | 0.228                  |

| Region     | Population size<br>(2000) | Life expectancy at<br>birth in years (2001) | Educational<br>attainment $\phi$ (1997) | Per capita income in<br>Euros (2000) | Gini (1995–2000) |
|------------|---------------------------|---------------------------------------------|-----------------------------------------|--------------------------------------|------------------|
| Abruzzo    | 1,280,150                 | 80.7#                                       | 76.1                                    | 25,098.26^                           | 0.274†††         |
| Molise     | 327,582                   | 80.7#                                       | 73.9                                    | 25,098.26^                           | 0.274†††         |
| Laetium    | 5,283,190                 | 79.8                                        | 78.3                                    | 24,187.74                            | 0.281            |
| Sardinia   | 1,649,966                 | 79.7                                        | 62.7                                    | 23,994.07                            | 0.304            |
| Apulia     | 4,085,924                 | 80.1                                        | 65.6                                    | 21,815.66                            | 0.323            |
| Campania   | 5,781,601                 | 78.4                                        | 64.2                                    | 18,218.53                            | 0.342            |
| Calabria   | 2,046,883                 | 80.1                                        | 73.5                                    | 17,436.10                            | 0.320††††        |
| Sicily     | 5,082,247                 | 79.4                                        | 65.4                                    | 17,413.38                            | 0.378            |
| Basilicata | 605,495                   | 80.0                                        | 73.5                                    | 16,492.53                            | 0.320††††        |
| Mean       | 4,690,518                 | 79.8                                        | 68.67                                   | 26,107.35                            | 0.288            |
| SD         | 2,388,687                 | 0.625                                       | 5.81                                    | 5,692.58                             | 0.042            |

Sources: Data on population size, life expectancy and educational attainment were taken from ISTAT (<http://www.istat.it>).

Data on per capita income and gini coefficient were from Banca d'Italia (<http://www.bancaditalia.it>).

$\phi$ Educational attainment was measured as the proportion of persons 19 years old having a high school diploma.

\*Aggregated value of life expectancy at birth for Piedmont and Aosta Valley

#Aggregated value of life expectancy at birth for Abruzzo and Molise

&Aggregated value of per capita income for Piedmont and Aosta Valley

^Aggregated value of per capita income for Abruzzo and Molise

†Aggregated value of Gini coefficient for Piedmont and Aosta Valley

††Aggregated value of Gini coefficient for Trentino Alto Adige and Friuli Venezia Giulia

†††Aggregated value of Gini coefficient for Abruzzo and Molise

††††Aggregated value of Gini coefficient for Calabria and Basilicata
