# Supplementary material
Source: PubMed Central journal article supplement (PMC1733006)
Supplement: jepicomh_59_2_158__2.pdf [file jepicomh_59_2_158__2.pdf]

**Table B** Population size, life expectancy at birth, per capita income, and Gini coefficients across top industrialized nations (n=21)

| Region         | Population size—millions (2001) | Life expectancy at birth—years (2001) | GDP per capita—PPP US\$ (2001) | Gini Index (survey year) |
|----------------|---------------------------------|---------------------------------------|--------------------------------|--------------------------|
| Luxembourg     | 0.4                             | 78.1                                  | 53,780                         | 30.8 (1998)              |
| United States  | 288.0                           | 76.9                                  | 34,320                         | 40.8 (1997)              |
| Norway         | 4.5                             | 78.7                                  | 29,620                         | 25.8 (1995)              |
| Denmark        | 5.3                             | 76.4                                  | 29,000                         | 24.7 (1997)              |
| Switzerland    | 7.2                             | 79.0                                  | 28,100                         | 33.1 (1992)              |
| Netherlands    | 16.0                            | 78.2                                  | 27,190                         | 32.6 (1994)              |
| Canada         | 31.0                            | 79.2                                  | 27,130                         | 31.5 (1997)              |
| Belgium        | 10.3                            | 78.5                                  | 25,520                         | 25.0 (1996)              |
| Australia      | 19.4                            | 79.0                                  | 25,370                         | 35.2 (1994)              |
| Germany        | 82.3                            | 78.0                                  | 25,350                         | 38.2 (1998)              |
| Japan          | 127.3                           | 81.3                                  | 25,130                         | 24.9 (1993)              |
| Italy          | 57.5                            | 78.6                                  | 24,670                         | 36.0 (1998)              |
| Finland        | 5.2                             | 77.8                                  | 24,430                         | 25.6 (1995)              |
| Sweden         | 8.9                             | 79.9                                  | 24,180                         | 25.0 (1995)              |
| United Kingdom | 58.9                            | 77.9                                  | 24,160                         | 36.0 (1995)              |
| France         | 59.6                            | 78.7                                  | 23,990                         | 32.7 (1995)              |
| Singapore      | 4.7                             | 77.8                                  | 22,680                         | 42.5 (1998)              |
| Spain          | 40.9                            | 79.1                                  | 20,150                         | 32.5 (1990)              |

| Region      | Population<br>size—millions<br>(2001) | Life expectancy<br>at birth—years<br>(2001) | GDP per<br>capita—PPP<br>US\$ (2001) | Gini Index<br>(survey year) |
|-------------|---------------------------------------|---------------------------------------------|--------------------------------------|-----------------------------|
| New Zealand | 3.8                                   | 78.1                                        | 19,160                               | 36.2 (1997)                 |
| Portugal    | 10.0                                  | 75.9                                        | 18,150                               | 38.5 (1997)                 |
| Greece      | 10.9                                  | 78.1                                        | 17,440                               | 35.4 (1998)                 |
| Mean        | 38.8                                  | 78.26                                       | 26,451                               | 32.67                       |
| SD          | 64.3                                  | 1.17                                        | 7,401                                | 5.47                        |

Sources: Data were taken from the United Nations Development Program's Human Development Indicators, 2003 ([www.undp.org](http://www.undp.org)).

Note: Austria was excluded because income inequality data was not available. Ireland, Israel and Slovenia were excluded because of social tensions and conflicts.
