# Supplementary material
Source: PubMed Central journal article supplement (PMC1733006)
Supplement: jepicomh_59_2_158_v2_1.pdf [file jepicomh_59_2_158_v2_1.pdf]

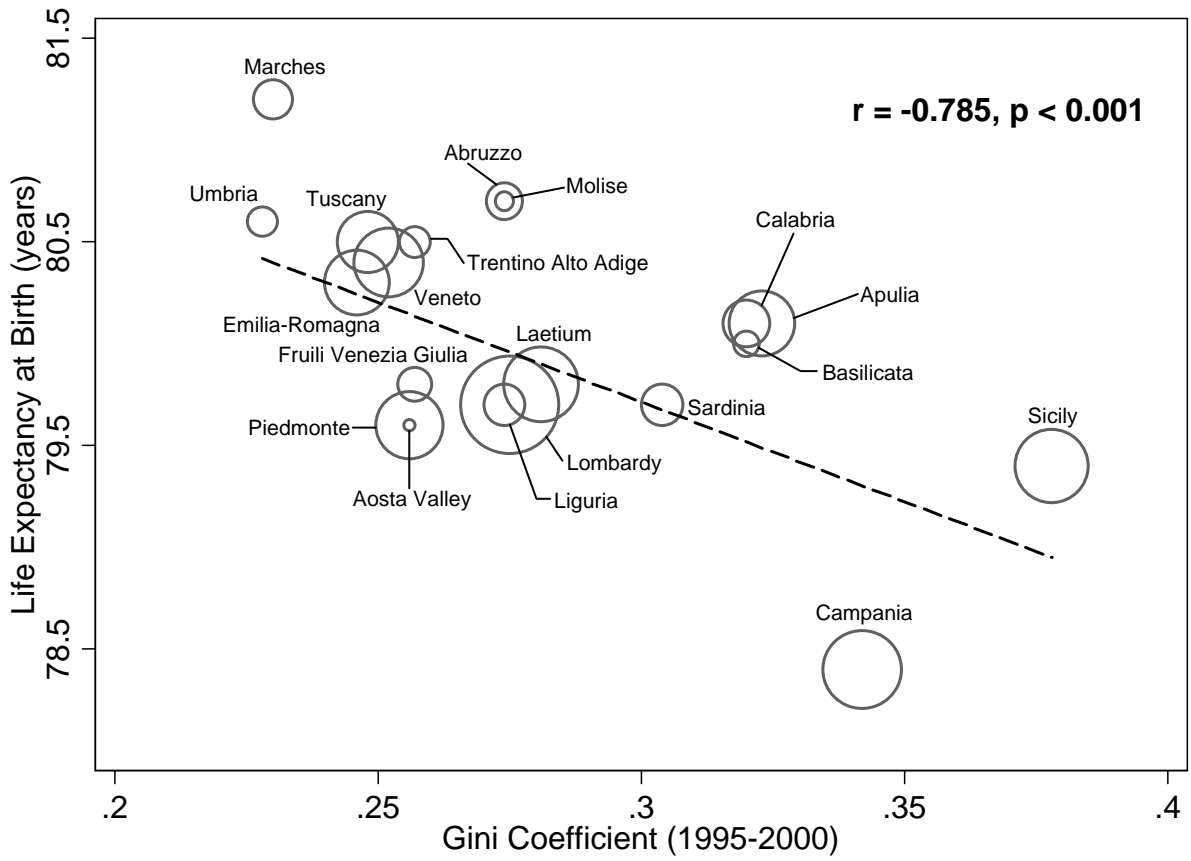

**Figure 1a** Income inequality and life expectancy at birth among Italian regions (n = 20). Data are weighted by population size and adjusted for gross domestic product per capita [ $r(\text{crude}) = -0.607, p < 0.005$ ;  $r(\text{adjusted for per capita income}) = -0.934, p = 0.011$ ;  $r(\text{weighted by population size}) = -0.658, p = 0.001$ ].

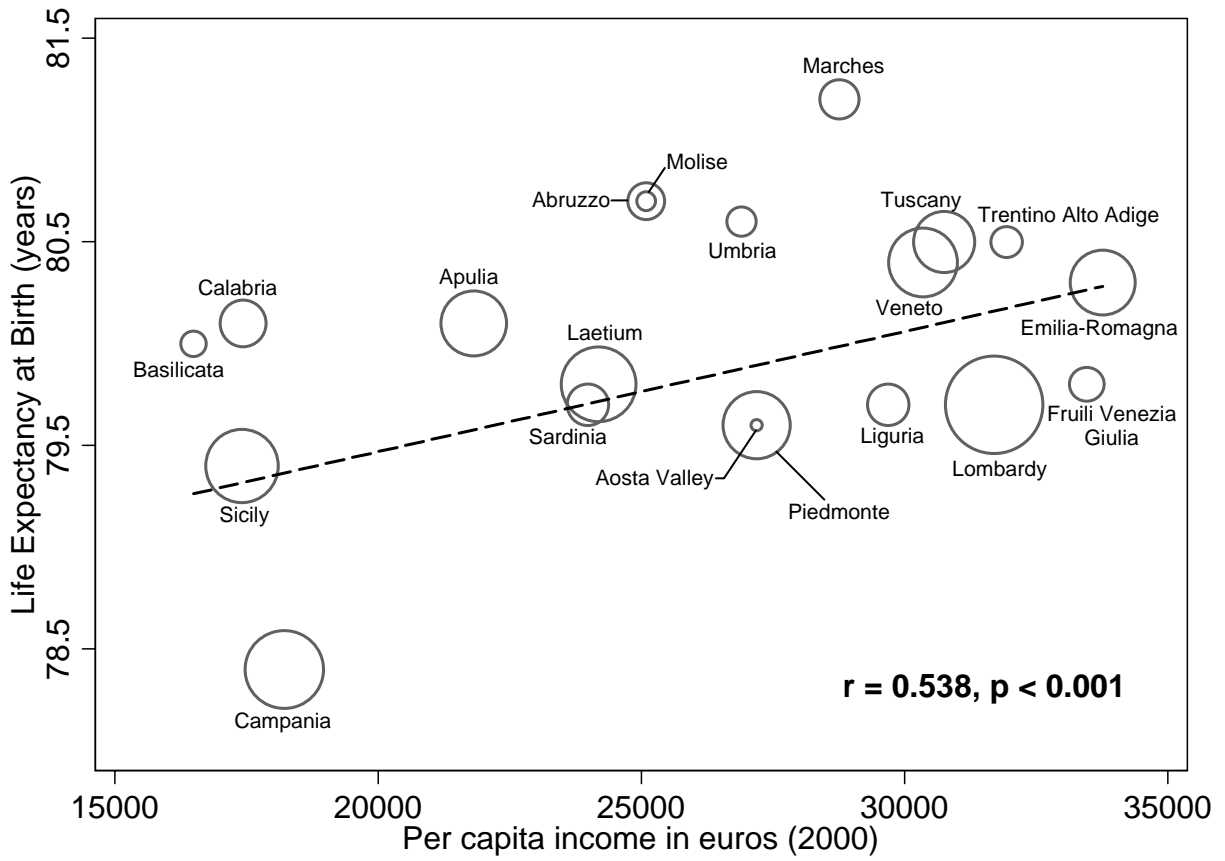

**Figure 1b** Economic development and life expectancy at birth among Italian regions (n = 20). Data are weighted by population size.

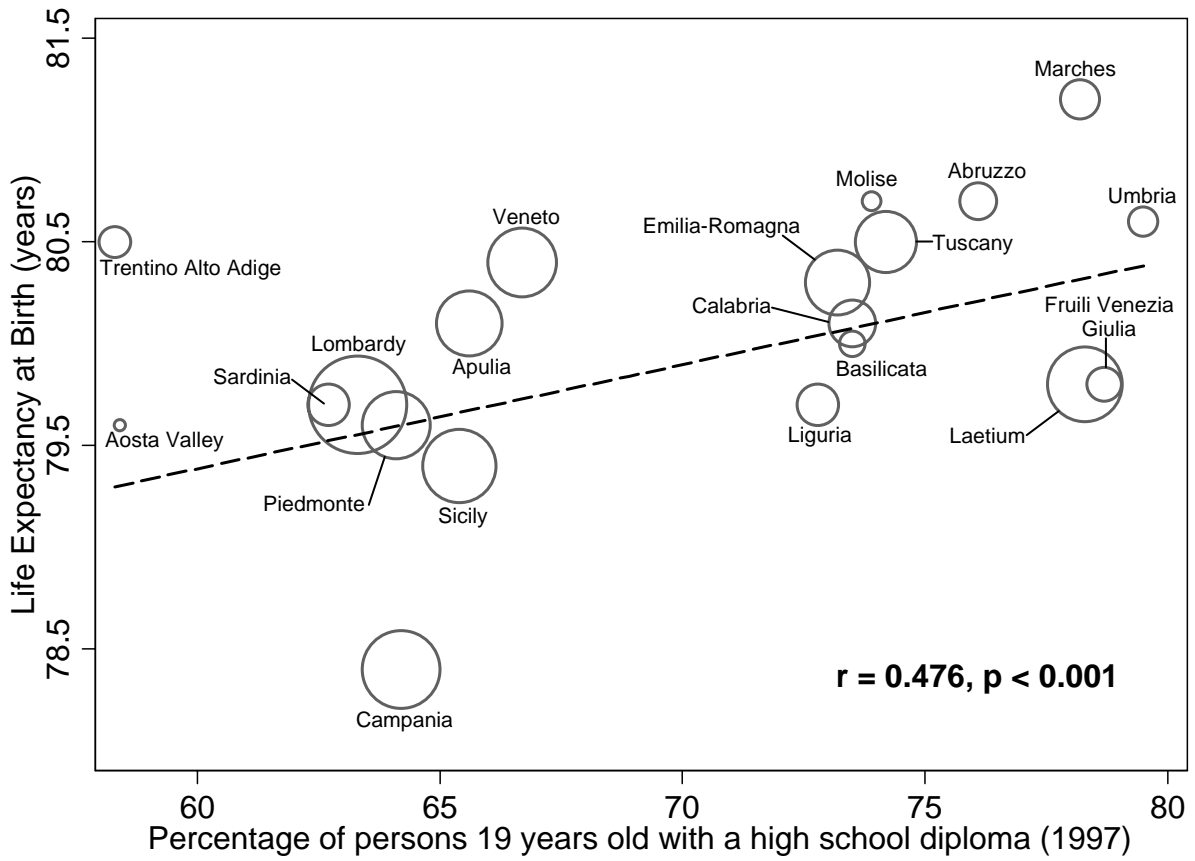

**Figure 1c** Association between educational attainment and life expectancy at birth among Italian regions (n = 20). Data are weighted by population size.

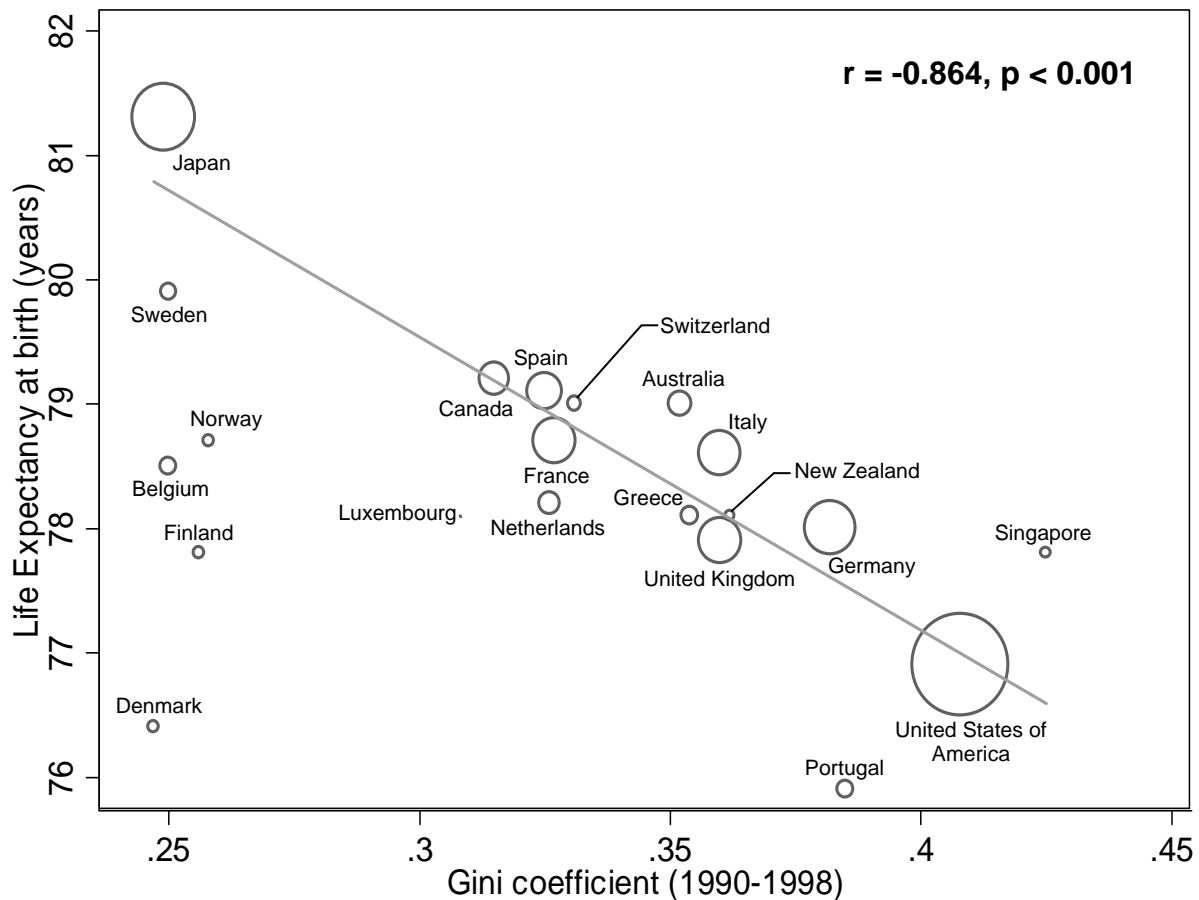

**Figure 2** Income inequality and life expectancy at birth among industrialised countries (n = 21). Data are from the United Nations Development Program's human development indicators published in 2003.<sup>30</sup> The correlation presented in the figure is weighted by population size and adjusted for per capita gross domestic product (GDP) [r(crude) = -0.415; p = 0.65; r(adjusted for per capita GDP) = -0.433, p = 0.065; r(weighted by population size) = -0.907, p<0.001].
